# Supplementary material
Source: publisher figshare collection journal article supplement (https://gsajournals.figshare.com/ndownloader/files/30745018)
Supplement: Supplementary file 1 [file 30745018]

## Sheet: MB_44v55_GO_BP
ID	GO:0060326	GO:0030595	GO:0045596	GO:0002688	GO:0097529	GO:0071621
Description	cell chemotaxis	leukocyte chemotaxis	negative regulation of cell differentiation	regulation of leukocyte chemotaxis	myeloid leukocyte migration	granulocyte chemotaxis
GeneRatio	17/265	12/265	31/265	9/265	11/265	8/265
BgRatio	97/8288	70/8288	389/8288	39/8288	67/8288	36/8288
pvalue	8.70205e-09	1.81418e-06	2.12199e-06	2.78543e-06	7.60947e-06	1.36581e-05
p.adjust	3.03354e-05	0.0024275	0.0024275	0.0024275	0.00530532	0.00793536
qvalue	2.66924e-05	0.00213598	0.00213598	0.00213598	0.00466821	0.0069824
Genes	CD74	CD74	ADIPOQ	CD74	CD74	CD74
	F7	F7	APOE	F7	GREM1	LGALS3
	FGF1	GREM1	TCTA	GREM1	LGALS3	CXCL13
	GREM1	LGALS3	CD38	CXCL13	CXCL13	CSF1
	GSTP1	CXCL13	CD74	CSF1	CSF1	PIK3CG
	HGF	CSF1	CETP	MPP1	EDNRB	MPP1
	LGALS3	EDNRB	CMTM5	TRPV4	PIK3CG	TRPV4
	CXCL13	PIK3CG	COL3A1	NCKAP1L	MPP1	NCKAP1L
	CSF1	MPP1	GDF10	PTK2B	TRPV4
	PRKCQ	TRPV4	GREM1		NCKAP1L
	EDNRB	NCKAP1L	LIN28A		PTK2B
	PIK3CG	PTK2B	LMX1A
	MPP1		MAG
	TRPV4		B2M
	NCKAP1L		EDNRB
	NR4A1		WNT1
	PTK2B		SFRP1
			DNM3
			MELTF
			TRPV4
			LOXL3
			IRF1
			MYOCD
			NODAL
			PHOX2B
			PTK2B
			SLC6A4
			SEMA6D
			RBM15
			ANKRD26
			ZFP36

## Sheet: MB_44v61_GO_BP
ID	GO:0044772	GO:0006260	GO:1903047	GO:0044770	GO:0006261	GO:0007423	GO:0008284	GO:0010564	GO:0090068	GO:0030855	GO:1901990	GO:0007601	GO:0044786	GO:1901987	GO:0050953	GO:0045787	GO:0051301	GO:0045596	GO:0043062	GO:0032101	GO:0140014	GO:0007088	GO:0048663	GO:0007346	GO:0060485	GO:0006270	GO:0050673	GO:0048762	GO:0044843	GO:0033260	GO:0031099	GO:0035239	GO:0048880	GO:0048665	GO:0000082	GO:0007584	GO:0051783	GO:0050678	GO:0030198	GO:1901989	GO:0001568	GO:0048514	GO:0071103	GO:0001101	GO:0048568	GO:0007600	GO:0001889	GO:0031100	GO:0006954
Description	mitotic cell cycle phase transition	DNA replication	mitotic cell cycle process	cell cycle phase transition	DNA-dependent DNA replication	sensory organ development	positive regulation of cell proliferation	regulation of cell cycle process	positive regulation of cell cycle process	epithelial cell differentiation	regulation of mitotic cell cycle phase transition	visual perception	cell cycle DNA replication	regulation of cell cycle phase transition	sensory perception of light stimulus	positive regulation of cell cycle	cell division	negative regulation of cell differentiation	extracellular structure organization	regulation of response to external stimulus	mitotic nuclear division	regulation of mitotic nuclear division	neuron fate commitment	regulation of mitotic cell cycle	mesenchyme development	DNA replication initiation	epithelial cell proliferation	mesenchymal cell differentiation	cell cycle G1/S phase transition	nuclear DNA replication	regeneration	tube morphogenesis	sensory system development	neuron fate specification	G1/S transition of mitotic cell cycle	response to nutrient	regulation of nuclear division	regulation of epithelial cell proliferation	extracellular matrix organization	positive regulation of cell cycle phase transition	blood vessel development	blood vessel morphogenesis	DNA conformation change	response to acid chemical	embryonic organ development	sensory perception	liver development	animal organ regeneration	inflammatory response
GeneRatio	66/805	45/805	88/805	69/805	30/805	68/805	84/805	74/805	38/805	64/805	45/805	33/805	17/805	48/805	33/805	46/805	62/805	70/805	45/805	67/805	34/805	26/805	17/805	60/805	36/805	11/805	44/805	30/805	34/805	14/805	27/805	78/805	44/805	11/805	32/805	32/805	27/805	37/805	38/805	18/805	64/805	57/805	27/805	39/805	49/805	51/805	22/805	16/805	53/805
BgRatio	287/8288	159/8288	443/8288	313/8288	87/8288	320/8288	453/8288	389/8288	145/8288	318/8288	196/8288	122/8288	39/8288	219/8288	124/8288	208/8288	326/8288	389/8288	211/8288	370/8288	139/8288	91/8288	45/8288	323/8288	155/8288	20/8288	209/8288	119/8288	145/8288	33/8288	103/8288	474/8288	218/8288	22/8288	137/8288	137/8288	106/8288	173/8288	180/8288	56/8288	373/8288	321/8288	110/8288	190/8288	262/8288	279/8288	81/8288	48/8288	295/8288
pvalue	1.13052e-11	1.68713e-11	2.06534e-11	2.96846e-11	2.19325e-10	2.31924e-10	2.20231e-09	6.89144e-09	7.03757e-09	8.01866e-09	2.53002e-08	3.01502e-08	3.36612e-08	4.12486e-08	4.64159e-08	5.96572e-08	1.24445e-07	1.80425e-07	2.55194e-07	2.63639e-07	2.68848e-07	2.73487e-07	4.14715e-07	4.67338e-07	4.74423e-07	5.0143e-07	5.09096e-07	6.79284e-07	7.79868e-07	8.37136e-07	1.07364e-06	1.52079e-06	1.71475e-06	1.75384e-06	1.79955e-06	1.79955e-06	1.97097e-06	2.78613e-06	2.85166e-06	2.9567e-06	3.39334e-06	4.02247e-06	4.23886e-06	4.35417e-06	4.43319e-06	5.60425e-06	5.65873e-06	6.17011e-06	6.20916e-06
p.adjust	3.02848e-08	3.02848e-08	3.02848e-08	3.26456e-08	1.70039e-07	1.70039e-07	1.38399e-06	3.43981e-06	3.43981e-06	3.52741e-06	1.01178e-05	1.10526e-05	1.13904e-05	1.29609e-05	1.36122e-05	1.6402e-05	3.22021e-05	4.40939e-05	5.46849e-05	5.46849e-05	5.46849e-05	5.46849e-05	7.93188e-05	8.29449e-05	8.29449e-05	8.29449e-05	8.29449e-05	0.00010672	0.000118298	0.000122752	0.000152353	0.000209061	0.000219895	0.000219895	0.000219895	0.000219895	0.000234332	0.000321653	0.000321653	0.000325163	0.000364081	0.000421305	0.000433369	0.000433369	0.000433369	0.000529633	0.000529633	0.000536365	0.000536365
qvalue	2.44942e-08	2.44942e-08	2.44942e-08	2.64037e-08	1.37527e-07	1.37527e-07	1.11937e-06	2.7821e-06	2.7821e-06	2.85295e-06	8.18322e-06	8.93926e-06	9.21254e-06	1.04827e-05	1.10095e-05	1.32659e-05	2.60449e-05	3.5663e-05	4.4229e-05	4.4229e-05	4.4229e-05	4.4229e-05	6.41528e-05	6.70855e-05	6.70855e-05	6.70855e-05	6.70855e-05	8.63151e-05	9.56789e-05	9.92814e-05	0.000123222	0.000169088	0.000177851	0.000177851	0.000177851	0.000177851	0.000189527	0.000260152	0.000260152	0.000262991	0.000294467	0.00034075	0.000350507	0.000350507	0.000350507	0.000428365	0.000428365	0.00043381	0.00043381
Genes	ANLN	ATAD5	ANLN	ANLN	ATAD5	ACTL6A	ALDH1A2	ANLN	ATAD5	ACTA2	ANLN	ABCA4	ATAD5	ANLN	ABCA4	ASCL1	ANLN	ADIPOQ	ADAMTS4	ADAMTS18	ANLN	ANLN	ASCL1	ANLN	ACTC1	CDC45	ALDH1A2	ALDH1A2	CCNA2	ATAD5	CCNA2	ADTRP	ACTL6A	ASCL1	CCNB1	ADIPOQ	ANLN	ALDH1A2	ADAMTS4	ATAD5	ACTA2	ADTRP	ANP32B	ADIPOQ	ALDH1A2	ABCA4	ALDH1A2	CCNA2	ADIPOQ
	ATAD5	BARD1	ATAD5	ATAD5	BCL6	ADAMTS18	AQP1	ATAD5	AURKB	ADAMTSL4	ATAD5	AIPL1	BCL6	ATAD5	AIPL1	ATAD5	AURKB	ANP32B	ADAMTSL4	ADIPOQ	AURKB	AURKB	DLL1	ASCL1	ACTA2	CDC7	APOE	ALX1	CCNB1	BCL6	CCNB1	AGR2	ADAMTS18	DLL1	CCND1	ALDH1A2	AURKB	APOE	ADAMTSL4	CCNB1	ADTRP	ANGPTL4	ASF1B	ALDH1A2	ALDH1A3	AIPL1	CCND1	CCND1	APOE
	AURKB	BCL6	AURKB	AURKB	CDC45	ALDH1A2	ASCL1	AURKB	CCNB1	ADIPOQ	AURKB	ARR3	CDC45	AURKB	ARR3	AURKB	BORA	APOE	ADTRP	ADTRP	BORA	BORA	DMRTA2	ATAD5	ALDH1A2	CDK2	CCND1	AMER1	CCND1	CDC45	CCND1	ALX1	ALDH1A2	DMRTA2	CDC45	ASCL1	BORA	CCND1	ADTRP	CCND1	ALDH1A2	APOB	BRIP1	APOB	ALX1	ARR3	CEBPA	CLDN1	BACE2
	BORA	BRIP1	BCL6	BORA	CDC7	ALDH1A3	ATAD5	BCL6	CCND1	AGR2	BUB1	COL11A1	CDC7	BUB1	COL11A1	CCNA2	BRIP1	TCTA	AEBP1	AIPL1	BUB1	BUB1	ESRP1	AURKB	ALX1	MCM10	COL8A2	EDNRB	CDC45	CDC7	CLDN1	ANGPTL4	ALDH1A3	ESRP1	CDC7	BRIP1	BUB1	RICTOR	AEBP1	CDC45	ANGPTL4	APOE	CCNB1	AQP1	CEBPA	COL11A1	CLDN1	CXCL12	BCL6
	BUB1	CCNA2	BORA	BUB1	CDK2	ANP32B	BCL6	BORA	CDC45	ANXA7	CCNB1	COL2A1	DBF4B	CCNB1	COL2A1	CCNB1	BUB1	ASCL1	ANTXR1	APOE	CCNA2	CCNA2	FOXA1	BCL6	AMER1	MCM2	RICTOR	EZH2	CDC7	DBF4B	TEC	APOB	GPM6A	FOXA1	CDK2	DGKQ	CCNA2	CXCL12	ANTXR1	CDC7	ANTXR1	AQP1	CDC45	ASCL1	COL11A1	COL2A1	E2F7	EZH2	PIK3CG
	CCNA2	CDC45	BUB1	CCNA2	CHTF18	ASCL1	BNC1	BUB1	CDC7	ASCL1	CCND1	EPAS1	DONSON	CCND1	EPAS1	CCNB2	CCNA2	BBS12	APOB	BCL6	CCNB1	CCNB1	FOXN4	BORA	EDNRB	MCM4	CXCL12	FGF10	CDK2	DONSON	CXCL12	APOE	COL8A2	GSX2	DBF4	CCND1	CCNB1	EDNRB	BGN	DBF4B	APOB	PIK3CG	CENPL	CCNB1	COL2A1	CXCL12	E2F8	F7	CEBPA
	CCNB1	CDC7	CCNA2	CCNB1	DBF4B	GPM6A	CCNA2	CCNA2	CDK2	CCND1	CDC45	TACSTD2	E2F7	CDC45	TACSTD2	CCND1	CCNB1	BCL6	APOC1	CD74	CCNB2	CCNB2	GSX2	BUB1	EZH2	MCM5	EDNRB	FOXA1	DBF4	FEN1	DHFR	AQP1	DIO3	ISL1	DHFR	CYBB	CCNB2	TACSTD2	CDH1	DTL	APOE	COL8A2	CENPN	CLDN1	DLL1	EDNRB	RHBDD3	GLI1	CPN1
	CCNB2	CDK2	CCNB1	CCNB2	DONSON	CCNA2	CCNB1	CCNB1	DBF4B	CLDN1	CDC7	GJC1	E2F8	CDC7	GJC1	CDC45	CCNB2	CCND1	APOE	PIK3CG	CCND1	CCND1	ISL1	CCNA2	FGF10	MCM7	TACSTD2	GREM1	DHFR	LIG1	EZH2	PIK3CG	DLL1	ISL2	E2F1	DNTT	CCND1	FGF1	COL11A1	EZH2	AQP1	CYBB	GINS4	CYBB	E2F7	EPAS1	EZH2	GSTP1	RICTOR
	CCND1	CHEK1	CCNB2	CCND1	E2F7	CEBPA	CCNB2	CCNB2	DTL	CNFN	CDK2	GLRA1	FBXO5	CDK2	GLRA1	CDC7	CCND1	CD74	BGN	DDX60	CDCA8	CHEK1	TBR1	CCNB1	FOXA1	ORC6	ESR1	HAS2	E2F1	PCNA	F7	COL8A2	FBN2	NKX6-1	E2F7	F7	CHEK1	FGF10	COL17A1	FBXO5	PIK3CG	DLL1	HELLS	DHFR	E2F8	TACSTD2	GLI1	AXL	CYBB
	CDC45	CHTF18	CCND1	CDC45	E2F8	COL11A1	CCND1	CCND1	E2F1	DLL1	DBF4B	GUCA1B	FEN1	CHEK1	GUCA1B	CDK2	CDC7	CETP	CDH1	CEBPA	CHEK1	FBXO5	GSX1	CCNB2	FOXD1	POLA2	FABP7	HMGA2	E2F7	POLA2	FGF10	CYBB	FGF10	OLIG3	E2F8	GSTP1	FBXO5	GLI1	COL2A1	FGF10	COL8A2	E2F7	HMGA2	E2F1	EPAS1	FZD2	HMOX1	HMOX1	EDNRB
	CDC7	DBF4	CDC45	CDC7	FBXO5	COL2A1	CD74	CDC45	E2F7	DSP	DONSON	IMPG2	LIG1	DBF4B	IMPG2	CHEK1	CDCA2	CMTM5	CETP	TEC	FBXO5	KIF11	WNT1	CCND1	GREM1	TICRR	FGF1	ISL1	E2F8	RFC4	GLI1	DLL1	FOXN4	SIX1	EZH2	HMOX1	KIF11	GLUL	COL8A2	GLI1	CYBB	E2F8	ITGB3BP	EGR1	FBN2	FZD4	JARID2	WNT1	RHBDD3
	CDK2	DBF4B	CDC7	CDK2	FEN1	COL8A2	CDC7	CDC7	E2F8	E2F7	DTL	KCNJ10	PCNA	DONSON	KCNJ10	DBF4B	CDCA8	RUFY3	COL11A1	CPN1	INCENP	KNTC1	ISL2	CDC45	HAS2		FGF10	WNT4	EZH2	RFC5	GPX1	E2F7	FZD4		FBXO5	IGFBP2	KNTC1	GPX1	COL9A3	MTBP	DLL1	EMP2	KNL1	F7	FGF10	GJC1	WNT4	NOTCH1	ESR1
	DBF4	DONSON	CDCA8	CHEK1	GINS4	DIO3	CDCA7L	CDK2	ECT2	E2F8	E2F1	PDE6C	POLA2	DTL	PDE6C	DTL	CDK2	DIO3	COL17A1	RICTOR	KIF11	PLK1	NKX6-1	CDC7	HMGA2		GLI1	EPHA3	FBXO5	RPA2	GSTP1	E2F8	ISL1		FGF10	LIPG	WNT4	HAS2	EGFL6	NEUROG1	E2F7	EPAS1	RAD54L	FZD4	FLT3LG	GLRA1	WNT1	PCNA	FANCD2
	DBF4B	DTL	CDK2	DBF4	LIG1	DLL1	CDK2	CHEK1	EZH2	EMX1	E2F7	LRAT	RFC4	E2F1	LRAT	E2F1	CECR2	DLL1	COL2A1	CXCL12	KNSTRN	TTK	NOTCH1	CDK2	ISL1		GLUL	SFRP1	FGF10	RPA3	AXL	EMP2	CRYAB		IQGAP3	GIPR	PLK1	HMOX1	FBN2	PHOX2B	E2F8	FGF1	MCM2	GLRA1	FOXN4	GPX1	NKX2-8	TGFB1	GPX1
	DHFR	E2F7	CHEK1	DBF4B	POLQ	ESRP1	CGA	DBF4B	FBXO5	ESR1	E2F8	BBS7	RFC5	E2F7	BBS7	E2F7	CKAP2	E2F1	COL8A2	EDNRB	KNTC1	CENPE	OLIG3	CHEK1	WNT4		GPX1	WNT16	GLI1		HMOX1	EPAS1	PDE6C		MCM10	LRAT	TTK	HTRA1	GREM1	TGFB1	EGR1	FGF10	MCM4	GSTP1	FZD2	GUCA1B	NODAL	UCP2	GSTP1
	DONSON	E2F8	CKAP2	DHFR	MCM10	FBN2	RICTOR	DONSON	FEN1	ESRP1	EZH2	GUCY2F	RPA2	E2F8	GUCY2F	E2F8	DLL1	EDNRB	COL9A3	RHBDD3	PLK1	SMC5	PRRX1	DBF4B	EPHA3		HAS2	BMP5	IQGAP3		ISL1	TACSTD2	CHRDL1		MCM2	SLC6A4	CENPE	IQGAP3	HAPLN2	TOPAZ1	EMP2	FOXC2	MCM7	IGFBP2	GJA5	IMPG2	NOTCH1	HGF	AXL
	DTL	FBXO5	DBF4	DONSON	MCM2	FGF10	CXCL12	DTL	FGF10	EZH2	FBXL7	GJA8	RPA3	EZH2	GJA8	ECT2	E2F7	TACSTD2	EGFL6	ESR1	TTK	MAD2L1	SIX1	DONSON	SFRP1		HMOX1	NOTCH1	MCM10		MAG	ESR1	BBS7		MCM4	CYP26B1	SMC5	ISL1	HAS2	UBE2C	EPAS1	FZD4	MIS18A	GIPR	GLI1	KCNJ10	ONECUT1		HMOX1
	E2F1	FEN1	DBF4B	DTL	MCM4	FOXN4	DBF4B	E2F1	GLI1	FGF10	FBXO5	TULP1		FBXL7	TULP1	EZH2	E2F8	EZH2	FBN2	F7	CENPE	MTBP		DTL	WNT16		HTRA1	OSR1	MCM2		WNT1	FGF1	GJA8		MCM5	SFRP1	MAD2L1	KLF9	HTRA1	WNT10B	FGF1	GJA5	MIS18BP1	LRAT	ITGA8	PDE6C	PCK1		HYAL2
	E2F7	FGF10	DHFR	E2F1	MCM5	FZD2	DLL1	E2F7	HMGA2	FOSL2	FGF10	SLITRK6		FBXO5	SLITRK6	FBXO5	ECT2	FGF10	GREM1	FABP7	SPAG5	NDC80		E2F1	BMP5		IQGAP3	PHOX2B	MCM4		MATN2	FGF10	TULP1		MCM7	NCOA1	MTBP	LAMB1	ITGA3		FGF10	GJC1	NCAPD2	COL3A1	SLC39A3	UCHL1	PCNA		IL5RA
	E2F8	GINS4	DONSON	E2F7	MCM7	FZD4	DMRTA2	E2F8	WNT4	FOXA1	HAUS6	IMPG1		FGF10	IMPG1	FEN1	ERCC6L	FOXA1	HAPLN2	FANCD2	SMC5	NEUROG1		E2F7	NODAL		ISL1	SEMA3B	MCM5		NOTCH1	FOXA1	SLITRK6		MTBP	SLC6A19	NDC80	TGM1	ITGA8		FOXC2	GPX1	NCAPG2	CTGF	KDR	LRAT	TGFB1		ISL1
	EZH2	GLI1	DTL	E2F8	ORC6	ITGA8	E2F1	ECT2	CTGF	FZD2	HAUS8	SLC24A1		GLI1	SLC24A1	FGF10	PIMREG	GDF10	HAS2	FGF1	MAD2L1	NUSAP1		E2F8	NOTCH1		KLF9	SEMA3C	MCM7		PCNA	FOXC2	SLC4A5		NACC2	P2RX5	NEUROG1	KDR	LAMB1		FZD4	GREM1	NCAPH2	KDR	BBS7	BBS7	UCP2		KARS
	FBXL7	PCLAF	E2F1	EZH2	PCNA	LGR5	EDNRB	EZH2	SPAG5	GLI1	HMGA2	PDE6A		HAUS6	PDE6A	FLT3LG	FBXL7	GREM1	HTRA1	FGF10	MTBP	TACC3		EZH2	OSR1		LAMB1	SIX2	MTBP		PRRX1	FOXD1	PDE6A		ORC6	P2RY11	NUSAP1	SFRP1	ADAMTS14		GJA5	HAS2	NUSAP1	SLC6A4	MMP14	GUCY2F	HGF		KRT1
	FBXO5	LIG1	E2F7	FBXL7	POLA2	CRYAB	EGR1	FBXL7	MYBBP1A	GPX1	KNTC1	EFEMP1		HAUS8	EFEMP1	FOXA1	FBXO5	ISL1	ITGA3	GPX1	MYBL2	TGFA		FBXL7	PHOX2B		LGR5	SNAI2	NACC2		TGFB1	FOXN4	WNT16		PCNA	P2RY12	TACC3	WFDC1	SCUBE3		GJC1	HMGA2	POLE3	EPHA3	SLITRK6	GJA8			CXCL13
	FGF10	POLQ	E2F8	FBXO5	POLE	PRDM16	EMP2	FBXO5	SMC5	GREM1	PLK1	CLRN1		HMGA2	CLRN1	GLI1	FGF1	LIN28A	ITGA8	GREM1	NCAPD2	TGFB1		FBXO5	SEMA3B		TGM1	SOX10	ORC6		THY1	FZD2	CPAMD8		POLA2	PCNA	TGFA	BMP5	ADAMTSL2		GPX1	HMOX1	RAD54B	CYP26B1	WNT1	TULP1			ALOX5
	FOXM1	NFIC	ECT2	FGF10	POLE2	PDE6C	ESR1	FEN1	MAD2L1	GSTA1	TTK	COL18A1		KNTC1	COL18A1	HMGA2	HAUS6	LMX1A	LAMB1	GSTP1	NCAPH2	TRIP13		FGF10	SEMA3C		KDR	TGFB1	PCNA		UCP2	FZD4	EFEMP1		POLE	SERPINC1	TGFB1	GHSR	COL3A1		GREM1	ISL1	RBBP4	SFRP1	LRIG3	SLITRK6			RASGRP1
	HAUS6	MCM10	EZH2	FOXM1	RFC4	CHRDL1	EZH2	FGF10	MTBP	HAPLN2	CENPE	PDE6H		PLK1	PDE6H	WNT4	HAUS8	MAG	LIPG	GUCA1B	NDC80	UBE2C		FOXA1	SIX1		MMP14	TWIST1	POLA2		WNT10B	GJA5	FBN1		POLE2	SNAI2	TRIP13	NKX2-8	COL28A1		HAS2	KRT1	RPA2	KCNK4	WNT16	ADRA2C			PROS1
	HAUS8	MCM2	FBXL7	GLI1	RFC5	BBS7	FBXO5	FOXM1	NDC80	KRT15	CEP152	RBP3		TTK	RBP3	CTGF	HELLS	WNT4	ADAMTS14	HTRA1	NEUROG1			HAUS6	SIX2		SFRP1	WWTR1	POLE		HGF	GJC1	GNGT1		POLE3	TBXA2R	UBE2C	NODAL	CTGF		HMGA2	CXCL13	SMARCA1	COL18A1	EFEMP1	IMPG1			OSMR
	HMGA2	MCM4	FBXO5	HAUS6	RPA2	GJA8	FGF1	GLI1	NEUROG1	KRT18	MAD2L1	RBP4		CENPE	RBP4	TGM1	HMGA2	MCF2	SCUBE3	HYAL2	NUSAP1			HAUS8	SNAI2		WNT16	AXIN2	POLE2			GLI1	MYOM1		PSME1	TGFB1		NOTCH1	KDR		HMOX1	WNT4		MYB	BMP5	SLC24A1			PRKCQ
	IQGAP3	MCM5	FGF10	HAUS8	RPA3	TULP1	FGF10	HAUS6	NUSAP1	KRT1	MTBP	RLBP1		CEP152	RLBP1	SPAG5	INCENP	NR2F1	ADAMTSL2	ISL1	SGO1			HMGA2	SOX10		WFDC1	KLHL12	POLE3			GPX1	NES		RBBP8	TNFRSF11B		OSR1	MMP14		ISL1	COL3A1		NFATC4	CLRN1	PDE6A			CD163
	KNTC1	MCM7	FOXM1	HMGA2	TICRR	SLITRK6	FLT3LG	HAUS8	PCNA	LGALS3	NACC2	RPGRIP1		MAD2L1	RPGRIP1	MYBBP1A	ITGB3BP	COL3A1	COL3A1	KARS	TACC3			INCENP	TBX20		BMP5	HGF	PSME1			GREM1	NEUROD4		RPA2	TRPV1		SERPINF1	VCAN		KRT1	CTGF		NTRK1	NCOA1	KCNK4			CYP26B1
	PLK1	ORC6	HAUS6	IQGAP3		WNT1	FOSL2	HMGA2	PHOX2B	WNT4	NDC80	SIX6		MTBP	SIX6	SLC6A4	KIF11	B2M	COL28A1	KRT1	TGFA			KIF11	TGFB1		GHSR		RBBP8			HAS2	ACHE		RPA3	TYR		SIX1	LAMA2		CXCL13	KDR		OSR1	FBN1	EFEMP1			WFDC1
	TTK	ACHE	HAUS8	KNTC1		SLC4A5	FOXM1	INCENP	POC1A	KRT23	NEUROG1	SLC45A2		NACC2	SLC45A2	SMC5	KNSTRN	DIXDC1	CTGF	CXCL13	TGFB1			KNTC1	TWIST1		NKX2-8		RPA2			HHIP	PHOX2B		TFDP2	ARSB		SNAI2	RECK		WNT4	MMP14		PCK1	NES	CLRN1			GHSR
	CENPE	PCNA	HMGA2	PLK1		LRIG3	GLI1	CHORDC1	TFDP2	TGM1	ODF2	TYR		NDC80	TYR	MAD2L1	KNTC1	SLC6A4	KDR	RNF125	TRIP13			PLK1	WWTR1		NKX6-1		RPA3			HMGA2	PRDM1					TEK	FBN1		COL3A1	KLF5		PCNA	NEUROG1	COL18A1			ADAMTS12
	CEP152	POLA2	INCENP	TTK		PDE6A	GLUL	KIF11	TGFA	RILPL1	PCNA			NEUROG1		MTBP	LIG1	WNT1	MMP14	WNT4	UBE2C			TTK	AXIN2		NODAL		TFDP2			HMOX1	RBP4					TGFA	COL18A1		CTGF	SFRP1		PTK2B	NKX2-6	MBP			LPL
	MAD2L1	POLE	IQGAP3	CENPE		CYP26B1	GREM1	KNSTRN	TGFB1	KLF5	PHOX2B			ODF2		NDC80	CDCA3	BHLHE41	VCAN	PROS1				CENPE	KLHL12		NOTCH1					ISL1	RPGRIP1					TGFB1	NID1		KDR	GHSR		RBP4	NODAL	NIPSNAP1			LY75
	MCM10	POLE2	KIF11	CEP152		WNT16	HAS2	KNTC1	TOPAZ1	CLDN3	PKIA			PCNA		NEUROG1	KNL1	ISL2	LAMA2	TBR1				CEP152	HGF		OSR1					KRT1	RRM1					TWIST1	NOTCH1		MMP14	RECK		SERPINF1	NOTO	NTRK1			NFATC4
	MCM2	POLE3	KNSTRN	MAD2L1		CPAMD8	HMGA2	WNT4	UBE2C	SLITRK6	PSME1			PHOX2B		NUSAP1	PLK1	SFRP1	RECK	KDR				SMC5			SERPINF1					LGR5	SERPINF1					WNT10B	TGFB1		KLF5	COL18A1		SIX1	NOTCH1	MARVELD2			NOTCH1
	MCM4	RBBP4	KNTC1	MCM10		EFEMP1	HMOX1	PLK1	WNT10B	WNT1	RNASEH2B			PKIA		PCNA	CENPE	DNM3	FBN1	OSMR				MAD2L1			SIX1					CXCL13	SIX6						TNFRSF11B		SFRP1	NFATC4		UCP2	OSR1	PDE6H			PBK
	MCM5	RBBP8	LIG1	MCM2		BMP5	HTRA1	TTK		SLC4A5	RPA2			PSME1		PHOX2B	DIXDC1	EFEMP1	COL18A1	GUCY2F				MSH2			SNAI2					WNT4	SMOC1								GHSR	NODAL		WNT10B	POLE	RBP3			S1PR3
	MCM7	RFC4	WDR62	MCM4		CLRN1	IGFBP2	CENPE		CYP26B1	TFDP2			RNASEH2B		POC1A	SPAG5	BMP5	LPL	PRKCQ				MTBP			TEK					COL3A1	TGFB1								RECK	NOTCH1			PRDM1	RBP4			SERPINC1
	MTBP	RFC5	PLK1	MCM5		FBN1	IQGAP3	CTGF		CEP152	TGFB1			RPA2		TFDP2	SMC5	ADAMTS12	NID1	PDE6A				NACC2			TGFA					CTGF	TGIF2								COL18A1	PIK3R6			PRRX1	RLBP1			SERPINF1
	NACC2	RPA2	TTK	MCM7		GNGT1	ISL1	SPAG5		WNT16	TICRR			TFDP2		TGFA	MAD2L1	FBN1	NOTCH1	WFDC1				NDC80			TGFB1					KDR	THY1								NFATC4	PRDM1			RBP4	RPGRIP1			SIGLEC1
	NDC80	RPA3	CENPE	MTBP		MCM2	LAMB1	MYBBP1A		KEAP1	TRIP13			TGFB1		TGFB1	MIS18A	LRRC17	PLTP	THBD				NEUROG1			TWIST1					BBS7	TWIST1								NODAL	PRRX1			SIX1	SIX1			TBXA2R
	NES	RRM1	SPAG5	NACC2		MYOM1	LIN28A	SFRP1		BMP5	UBE2C			TICRR		TOPAZ1	MIS18BP1	NCAPG2	TGFB1	GHSR				NUSAP1			WNT10B					MMP14	ARID1A								NOTCH1	PTK2B			SIX2	SIX6			TEK
	NEUROG1	TICRR	CEP152	NDC80		NES	CLCF1	CEP152		CLRN1	WNT10B			TOPAZ1		UBE2C	NCAPD2	NFATC4	TNFRSF11B	ADAMTS12				ODF2								KLF5									OSR1	SERPINF1			STIL	SLC45A2			TGFB1
	ODF2		SMC5	NES		NEUROD4	TTK	SMC5		COL18A1				TRIP13		WNT10B	NCAPG2	NKX6-1		LPL				PCNA								WNT1									PIK3R6	SIX1			TBX20	SNAI2			TRIL
	ORC6		MAD2L1	NEUROG1		NEUROG1	CTGF	MAD2L1		NKX6-1				UBE2C			NDC80	NODAL		NCKAP1L				PHOX2B								SFRP1									PRDM1	TBX20			TGFB1	TMPRSS3			TRPV1
	PCNA		MCM10	ODF2		NKX2-6	TGM1	MTBP		NODAL				WNT10B			NOTCH1	NOTCH1		PLEK				PKIA								BMP5									PRRX1	TBXA2R			TWIST1	TRPV1			TRPV4
	PHOX2B		MCM2	ORC6		NOTCH1	KDR	NACC2		NOTCH1							NUSAP1	OSR1		NOTCH1				PSME1								GHSR									PTK2B	TEK			ARID1A	TYR			TYRO3
	PKIA		MCM4	PCNA		OSR1	OSMR	NDC80		NTRK1							ORC6	P2RY12		P2RY12				RNASEH2B								ADAMTS12									SEMA3C	TGFB1				WNT10B			VAMP8
	POLA2		MCM5	PHOX2B		ACHE	POU1F1	NEUROG1		MARVELD2							RBBP8	PHOX2B		PBK				RPA2								RECK									SERPINF1	THY1				NPY2R			PRKCD
	POLE		MCM7	PKIA		PHOX2B	PRKCQ	NUSAP1		ONECUT1							SGO1	PMP22		PTK2B				RPA3								COL18A1									SIX1	TNFAIP2							TIRAP
	POLE2		MSH2	POLA2		PRDM1	KLF5	ODF2		OSR1							SKA1	PRTG		SEMA3B				TACC3								NFATC4									TBX20	TWIST1							HGF
	POLE3		MTBP	POLE		PRRX1	WNT1	PCNA		PCK1							SKA3	PTK2B		SEMA3C				TFDP2								NODAL									TBXA2R	TYMP
	PSME1		MYBL2	POLE2		RBP4	SFRP1	PHOX2B		PCNA							SPC24	S1PR3		SERPINC1				TGFA								NOTO									TEK	PTPRB
	RBBP8		NACC2	POLE3		RPGRIP1	BMP5	PKIA		PRDM1							SPC25	SEMA3B		SERPINF1				TGFB1								NOTCH1									TGFB1	NPR1
	RNASEH2B		NCAPD2	PSME1		RRM1	GHSR	POC1A		S1PR3							TACC3	SEMA3C		SNAI2				TICRR								OSR1									THY1	HGF
	RPA2		NCAPH2	RBBP8		SERPINF1	COL18A1	PSME1		SIX1							TGFA	SIX2		TBXA2R				TRIP13								PIK3R6									TNFAIP2
	RPA3		NDC80	RNASEH2B		SIX1	MYB	RBBP4		SIX2							TGFB1	SKOR1		TEK				UBE2C								PRDM1									TWIST1
	TACC3		NES	RPA2		SIX2	NACC2	RBBP8		SPDEF							TOPAZ1	SNAI2		TGFB1				WNT10B								PRRX1									TYMP
	TFDP2		NEUROG1	RPA3		SIX6	NCKAP1L	RNASEH2B		TGFB1							UBE2C	SOX10		TRPV4												PTK2B									PTPRB
	TGFB1		NUSAP1	TACC3		SMOC1	NES	RPA2		UPK3A							WWTR1	SPDEF		TUBB2B												SERPINF1									ARID1A
	TICRR		ODF2	TFDP2		TGFB1	NKX2-6	RYBP		WNT10B								TGFB1		TYRO3												SIX1									NPR1
	TRIP13		ORC6	TGFB1		TGIF2	NODAL	STIL		WWTR1								THY1		VAMP8												SIX2									HGF
	UBE2C		PCNA	TICRR		THY1	NOTCH1	TACC3										TRPV1		PRKCD												SOX10
	WNT10B		PHOX2B	TOPAZ1		TWIST1	OSR1	TFDP2										TRPV4		TIRAP												STIL
			PKIA	TRIP13		WNT10B	PRRX1	TGFA										TWIST1		HGF												TBX20
			POC1A	UBE2C		ARID1A	PTK2B	TGFB1										WNT10B														TBXA2R
			POLA2	WNT10B			RNASEH2B	TICRR										WWTR1														TEK
			POLE				RPS9	TOPAZ1										AXIN2														TGFB1
			POLE2				S1PR3	TRIP13																								THY1
			POLE3				SIX1	UBE2C																								TNFAIP2
			PSME1				SIX2	WNT10B																								TWIST1
			RBBP8				SOX10	AXIN2																								TYMP
			RNASEH2B				TBX20																									PTPRB
			RPA2				TEK																									ARID1A
			RPA3				TGFA																									NPR1
			SGO1				TGFB1																									HGF
			SPC25				TMEM119
			STIL				TWIST1
			TACC3				WNT10B
			TFDP2				WWTR1
			TGFA				KLB
			TGFB1				TIRAP
			TICRR
			TRIP13
			UBE2C
			WNT10B
[truncated: 137 more columns]

## Sheet: MB_46v55_GO_BP
ID	GO:0045765
Description	regulation of angiogenesis
GeneRatio	16/229
BgRatio	147/8288
pvalue	2.67373e-06
p.adjust	0.00880191
qvalue	0.00796208
Genes	TSPAN12
	DCN
	FOXC2
	HMGA2
	ISL1
	KLF2
	KRT1
	CXCL13
	ADM
	THBS2
	NODAL
	NPPB
	PIK3R6
	PTK2B
	NPR1
	HGF

## Sheet: MB_46v61_GO_BP
ID	GO:0006260	GO:0006261	GO:1903047	GO:0044772	GO:0044770	GO:0051301	GO:0044786	GO:0071103	GO:0007346	GO:0006270	GO:0007423	GO:1901990	GO:0044843	GO:0033260	GO:0008284	GO:0000082	GO:0050673	GO:0090068	GO:0007088	GO:1901987	GO:0030855	GO:0043062	GO:0140014	GO:0031055	GO:0050678	GO:0034508	GO:0007601	GO:0032101	GO:0006323	GO:0034080	GO:0061641	GO:0035239	GO:0050953	GO:0048568	GO:0051783	GO:0048663	GO:0048146	GO:0006271	GO:0030198	GO:0045787	GO:0010564	GO:0045596	GO:0031099	GO:0048514	GO:0090596	GO:0006275	GO:0006954	GO:0001568	GO:0048285
Description	DNA replication	DNA-dependent DNA replication	mitotic cell cycle process	mitotic cell cycle phase transition	cell cycle phase transition	cell division	cell cycle DNA replication	DNA conformation change	regulation of mitotic cell cycle	DNA replication initiation	sensory organ development	regulation of mitotic cell cycle phase transition	cell cycle G1/S phase transition	nuclear DNA replication	positive regulation of cell proliferation	G1/S transition of mitotic cell cycle	epithelial cell proliferation	positive regulation of cell cycle process	regulation of mitotic nuclear division	regulation of cell cycle phase transition	epithelial cell differentiation	extracellular structure organization	mitotic nuclear division	chromatin remodeling at centromere	regulation of epithelial cell proliferation	centromere complex assembly	visual perception	regulation of response to external stimulus	DNA packaging	CENP-A containing nucleosome assembly	CENP-A containing chromatin organization	tube morphogenesis	sensory perception of light stimulus	embryonic organ development	regulation of nuclear division	neuron fate commitment	positive regulation of fibroblast proliferation	DNA strand elongation involved in DNA replication	extracellular matrix organization	positive regulation of cell cycle	regulation of cell cycle process	negative regulation of cell differentiation	regeneration	blood vessel morphogenesis	sensory organ morphogenesis	regulation of DNA replication	inflammatory response	blood vessel development	organelle fission
GeneRatio	48/805	32/805	89/805	66/805	68/805	66/805	18/805	31/805	63/805	12/805	62/805	44/805	36/805	15/805	79/805	34/805	45/805	35/805	26/805	46/805	59/805	44/805	33/805	11/805	38/805	12/805	30/805	65/805	20/805	10/805	10/805	78/805	30/805	50/805	27/805	16/805	13/805	8/805	38/805	42/805	66/805	66/805	26/805	57/805	34/805	19/805	53/805	63/805	45/805
BgRatio	159/8288	87/8288	443/8288	287/8288	313/8288	326/8288	39/8288	110/8288	323/8288	20/8288	320/8288	196/8288	145/8288	33/8288	453/8288	137/8288	209/8288	145/8288	91/8288	219/8288	318/8288	211/8288	139/8288	21/8288	173/8288	25/8288	122/8288	370/8288	64/8288	18/8288	18/8288	474/8288	124/8288	262/8288	106/8288	45/8288	31/8288	8288-12-01	180/8288	208/8288	389/8288	389/8288	103/8288	321/8288	156/8288	64/8288	295/8288	373/8288	238/8288
pvalue	2.48637e-13	7.50699e-12	8.20387e-12	1.13052e-11	8.30016e-11	3.59182e-09	4.28487e-09	2.7918e-08	3.68439e-08	3.93478e-08	6.14276e-08	7.32614e-08	7.97581e-08	1.1049e-07	1.11869e-07	1.85138e-07	1.90865e-07	2.54117e-07	2.73487e-07	2.99881e-07	6.0952e-07	6.72527e-07	8.38889e-07	9.60907e-07	1.02262e-06	1.02481e-06	1.20105e-06	1.22413e-06	1.38352e-06	1.49943e-06	1.49943e-06	1.52079e-06	1.73299e-06	1.92706e-06	1.97097e-06	2.3403e-06	2.43689e-06	2.65809e-06	2.85166e-06	2.91745e-06	3.53079e-06	3.53079e-06	3.65123e-06	4.02247e-06	4.54027e-06	5.93997e-06	6.20916e-06	6.89927e-06	8.12891e-06
p.adjust	1.08356e-09	1.19175e-08	1.19175e-08	1.2317e-08	7.23442e-08	2.60886e-06	2.66764e-06	1.52083e-05	1.71478e-05	1.71478e-05	2.43365e-05	2.66061e-05	2.67374e-05	3.25017e-05	3.25017e-05	4.89289e-05	4.89289e-05	6.15247e-05	6.27292e-05	6.53441e-05	0.00012649	0.000133222	0.000158951	0.000171773	0.000171773	0.000171773	0.000190528	0.000190528	0.000207112	0.000207112	0.000207112	0.000207112	0.00022886	0.000245414	0.000245414	0.000283306	0.000287026	0.000304841	0.000317857	0.000317857	0.000366361	0.000366361	0.000370048	0.000398407	0.0004397	0.000562748	0.000575735	0.000626396	0.00072001
qvalue	9.39588e-10	1.0334e-08	1.0334e-08	1.06804e-08	6.27317e-08	2.26221e-06	2.31318e-06	1.31876e-05	1.48693e-05	1.48693e-05	2.11029e-05	2.30709e-05	2.31848e-05	2.81831e-05	2.81831e-05	4.24276e-05	4.24276e-05	5.33498e-05	5.43943e-05	5.66618e-05	0.000109683	0.00011552	0.000137831	0.00014895	0.00014895	0.00014895	0.000165212	0.000165212	0.000179593	0.000179593	0.000179593	0.000179593	0.000198451	0.000212805	0.000212805	0.000245663	0.000248889	0.000264336	0.000275623	0.000275623	0.000317682	0.000317682	0.000320879	0.00034547	0.000381276	0.000487975	0.000499236	0.000543166	0.000624342
Genes	ATAD5	ATAD5	ANLN	ANLN	ANLN	ANAPC16	ATAD5	ANP32B	ANLN	CDC45	ACTL6A	ANLN	CCNA2	ATAD5	AKR1B1	CCNB1	ALDH1A2	ATAD5	ANLN	ANLN	ACTA2	ADAMTS4	ANLN	CENPA	ALDH1A2	CENPA	ABCA4	ADAMTS18	ANP32B	CENPA	CENPA	AGR2	ABCA4	ALDH1A2	ANLN	ASCL1	AQP1	FEN1	ADAMTS4	ASCL1	ANLN	ADIPOQ	CCNA2	ANGPTL4	COL11A1	ATAD5	ADIPOQ	ACTA2	ANLN
	BARD1	CDC45	ATAD5	ATAD5	ATAD5	ANLN	CDC45	BRIP1	ASCL1	CDC7	ADAMTS18	ATAD5	CCNB1	CDC45	ALDH1A2	CCND1	APOE	AURKB	AURKB	ATAD5	ADAMTSL4	ADAMTSL4	AURKB	CENPI	APOE	CENPI	AIPL1	ADIPOQ	CCNB1	CENPI	CENPI	ALX1	AIPL1	ALX1	AURKB	DLL1	CCNA2	GINS1	ADAMTSL4	ATAD5	ATAD5	ANP32B	CCNB1	APOE	COL2A1	CCNA2	APOE	ALDH1A2	AURKB
	BRIP1	CDC7	AURKB	AURKB	AURKB	AURKB	CDC7	CCNB1	ATAD5	CDK2	ALDH1A2	AURKB	CCND1	CDC7	AQP1	CDC45	CCND1	CCNB1	BORA	AURKB	ADIPOQ	AEBP1	BORA	CENPL	CCND1	CENPL	ARR3	AIPL1	CENPA	CENPL	CENPL	ANGPTL4	ARR3	ALX4	BORA	DMRTA2	CCNB1	GINS3	AEBP1	AURKB	AURKB	APOE	CCND1	AQP1	COL8A2	CDC7	BACE2	ANGPTL4	BORA
	ACHE	CDK2	BORA	BORA	BORA	BORA	CDT1	CDC45	AURKB	CDT1	ANP32B	BUB1	CDC45	CDT1	ASCL1	CDC7	COL8A2	CCND1	BUB1	BUB1	AGR2	ANTXR1	BUB1	CENPN	RICTOR	CENPN	COL11A1	APOE	CENPI	CENPN	CENPN	APOE	COL11A1	CEBPA	BUB1	ESRP1	CD74	GINS4	ANTXR1	CCNA2	BORA	TCTA	CLDN1	PIK3CG	DIO3	CDK2	CAMK4	ANTXR1	BRIP1
	CCNA2	CDT1	BUB1	BUB1	BUB1	BRIP1	DBF4B	CENPA	BORA	MCM10	ASCL1	CCNB1	CDC7	DBF4B	ATAD5	CDK2	RICTOR	CDC45	CCNA2	CCNB1	ANXA7	APOE	CCNA2	HELLS	CXCL12	HELLS	COL2A1	CD74	CENPL	ITGB3BP	ITGB3BP	AQP1	COL2A1	CHST11	CCNA2	FEZF2	E2F1	LIG1	BGN	CCNB1	BUB1	ASCL1	TEC	COL8A2	DLL1	CDT1	PIK3CG	APOE	BUB1
	CDC45	CHTF18	CCNA2	CCNA2	CCNA2	BUB1	DONSON	CENPI	BUB1	MCM2	ACHE	CCND1	CDK2	DONSON	BNC1	CDT1	CXCL12	CDC7	CCNB1	CCND1	ASCL1	BGN	CCNB1	ITGB3BP	EDNRB	ITGB3BP	EPAS1	PIK3CG	CENPN	KNL1	KNL1	PIK3CG	EPAS1	COL11A1	CCNB1	FOXA1	ESR1	PCNA	CDH1	CCNB2	CCNA2	BBS12	CXCL12	DLL1	FBN2	CHTF18	CEBPA	AQP1	CCNA2
	CDC7	DBF4B	CCNB1	CCNB1	CCNB1	CCNA2	E2F7	CENPL	CCNA2	MCM4	GPM6A	CDC45	CDT1	FEN1	CCNA2	DBF4	EDNRB	CDK2	CCNB2	CDC45	CCND1	CDH1	CCNB2	KNL1	TACSTD2	KNL1	TACSTD2	DDX60	HELLS	MIS18A	MIS18A	COL8A2	TACSTD2	COL2A1	CCNB2	FOXN4	FGF10	POLE	COL11A1	CCND1	CCNB1	CCND1	DHFR	E2F7	FGF10	DBF4	CFI	PIK3CG	CCNB1
	CDK2	DONSON	CCNB2	CCNB2	CCNB2	CCNB1	E2F8	CENPN	CCNB1	MCM5	CCNA2	CDC7	DBF4	GINS1	CCNB1	DHFR	TACSTD2	CDT1	CCND1	CDC7	CLDN1	CETP	CCND1	MIS18A	FGF1	CENPE	GJC1	CEBPA	HMGA2	MIS18BP1	MIS18BP1	DLL1	GJC1	DLL1	CCND1	GSX2	FOSL2	RFC4	COL17A1	CDC45	CCNB2	CD74	EZH2	E2F8	FOXN4	DBF4B	CIITA	COL8A2	CCNB2
	CDT1	E2F7	CCND1	CCND1	CCND1	CCNB2	FBXO5	GINS1	CCNB2	MCM7	CEBPA	CDK2	DHFR	LIG1	CCNB2	E2F1	ESR1	DBF4B	CDT1	CDK2	CNFN	COL11A1	CDCA8	MIS18BP1	FGF10	MIS18A	GLRA1	CFI	ITGB3BP	POLE3	POLE3	E2F7	GLRA1	E2F7	CDT1	ISL1	WNT1		COL2A1	CDC7	CCND1	CETP	F7	EMP2	FZD2	DONSON	CMKLR1	DLL1	CCND1
	CHEK1	E2F8	CDC45	CDC45	CDC45	CCND1	FEN1	GINS4	CCND1	ORC6	COL11A1	CDT1	E2F1	PCNA	CCND1	E2F7	FABP7	DTL	CHEK1	CDT1	DLL1	COL17A1	CDT1	POLE3	GLI1	MIS18BP1	GUCA1B	TEC	KNL1	RBBP4	RBBP4	E2F8	GUCA1B	E2F8	CHEK1	TBR1	MYB		COL8A2	CDK2	CDC45	CMTM5	FGF10	EPAS1	GNGT1	E2F7	CPN1	E2F7	CDCA8
	CHTF18	FBXO5	CDC7	CDC7	CDC7	CDC7	GINS1	HELLS	CDC45	POLA2	COL2A1	DBF4B	E2F7	POLA2	CD74	E2F8	FGF1	E2F1	FBXO5	CHEK1	DSP	COL2A1	CHEK1	RBBP4	GLUL	POLE3	IMPG2	CMKLR1	MCM2			EMP2	IMPG2	EPAS1	FBXO5	GSX1	RNASEH2B		COL9A3	CDT1	CDC7	DIO3	GLI1	FGF1	ITGA8	E2F8	RICTOR	E2F8	CDT1
	DBF4	FEN1	CDCA8	CDK2	CDK2	CDCA2	LIG1	HMGA2	CDC7	TICRR	COL8A2	DONSON	E2F8	RFC4	CDC7	EZH2	FGF10	E2F7	KIF11	DBF4B	E2F7	COL8A2	FBXO5		GPX1	RBBP4	KCNJ10	CPN1	MIS18A			EPAS1	KCNJ10	FBN2	KIF11	WNT1	TGFB1		CRISPLD2	CHEK1	CDK2	DLL1	GPX1	FGF10	SIX4	FBXO5	EDNRB	EMP2	CHEK1
	DBF4B	GINS1	CDK2	CDT1	CDT1	CDCA8	PCNA	ITGB3BP	CDK2		DIO3	DTL	EZH2	RFC5	CDCA7L	FBXO5	GLI1	E2F8	KNTC1	DONSON	E2F8	COL9A3	INCENP		HMOX1		BBS7	RICTOR	MIS18BP1			TACSTD2	BBS7	FGF10	KNTC1	NKX6-1	DDR2		FBN2	CKS2	CDT1	E2F1	AXL	FOXC2	BCAR3	FGF10	RHBDD3	EPAS1	CKS2
	DONSON	GINS3	CDT1	CKS2	CHEK1	CDK2	POLA2	KNL1	CDT1		DLL1	E2F1	FBXO5	RPA2	CDK2	FGF10	GLUL	ECT2	PLK1	DTL	EMX1	CRISPLD2	KIF11		HTRA1		GUCY2F	CXCL12	NCAPD2			ESR1	GUCY2F	FOXN4	WNT4	OLIG3			HAPLN2	DBF4B	CHEK1	EDNRB	HMOX1	FZD4	CHRNA9	GLI1	ESR1	FGF1	FANCD2
	DTL	GINS4	CENPA	DBF4	CKS2	CDT1	RFC4	RAD54L	CHEK1		ESRP1	E2F7	FGF10	RPA3	CGA	IQGAP3	GPX1	EZH2	CENPE	E2F1	ESR1	FBN2	KNSTRN		IQGAP3		GJA8	EDNRB	NCAPG2			FGF1	GJA8	FZD2	PLK1	PRRX1			HTRA1	DTL	DBF4B	TACSTD2	ISL1	GJA5	WNT1	ID3	FANCD2	FGF10	FBXO5
	E2F7	LIG1	CHEK1	DBF4B	DBF4	CENPA	RFC5	MCM2	CKS2		FBN2	E2F8	GLI1		RICTOR	MCM10	HMOX1	FBXO5	SMC5	E2F7	ESRP1	HAPLN2	KNTC1		ISL1		IMPG1	RHBDD3	NCAPH2			FGF10	IMPG1	GJA5	CENPE	SIX1			ITGA3	E2F1	DONSON	EZH2	MAG	GJC1	LRIG3	PCNA	GPR17	FOXC2	INCENP
	E2F8	POLQ	CKAP2	DHFR	DBF4B	CKAP2	RPA2	MCM4	DBF4B		FGF10	EZH2	IQGAP3		CXCL12	MCM2	HTRA1	FEN1	MAD2L1	E2F8	EZH2	HTRA1	PLK1		KLF9		SLC24A1	ESR1	NUSAP1			FOXA1	SLC24A1	GLI1	SMC5				ITGA8	E2F7	DTL	FEZF2	WNT1	GPX1	CYP26B1	RFC4	GPX1	FZD4	KIF11
	FBXO5	MCM10	CKS2	DONSON	DHFR	CKS2	RPA3	MCM7	DONSON		FOXN4	FBXL7	MCM10		DBF4B	MCM4	IQGAP3	FGF10	MTBP	EZH2	FGF10	ITGA3	CENPE		LAMB1		PDE6A	F7	POLE3			FOXC2	PDE6A	ID3	MAD2L1				KAZALD1	E2F8	E2F1	FGF10	MATN2	HMGA2	WNT16	RFC5	AXL	GJA5	KNSTRN
	FEN1	MCM2	DBF4	DTL	DONSON	DLL1		MIS18A	DTL		FZD2	FBXO5	MCM2		DLL1	MCM5	ISL1	GLI1	NDC80	FBXL7	FOSL2	ITGA8	SPAG5		TGM1		EFEMP1	FABP7	RBBP4			FOXD1	EFEMP1	ITGA8	MTBP				LAMB1	ECT2	E2F7	FOXA1	OMG	HMOX1	EFEMP1	TICRR	HMOX1	GJC1	KNTC1
	FGF10	MCM4	DBF4B	E2F1	DTL	E2F7		MIS18BP1	E2F1		FZD4	FGF10	MCM4		DMRTA2	MCM7	KLF9	HMGA2	NEUROG1	FBXO5	FOXA1	KAZALD1	SMC5		SIX4		CLRN1	FANCD2	CDKN2A			FOXN4	CLRN1	SLC39A3	NDC80				SCUBE3	EZH2	E2F8	GDF10	PCNA	ISL1	CLRN1		HYAL2	GPX1	WNT4
	GINS1	MCM5	DHFR	E2F7	E2F1	E2F8		NCAPD2	E2F7		GNGT1	HAUS6	MCM5		E2F1	MTBP	LAMB1	WNT4	NUSAP1	FGF10	FZD2	LAMB1	MAD2L1		KDR		COL18A1	FEZF2				FZD2	COL18A1	SIX4	NEUROG1				ADAMTSL2	FBXO5	ECT2	ID3	PRRX1	KRT1	FBN1		IL5RA	HMGA2	PLK1
	GINS3	MCM7	DONSON	E2F8	E2F7	ECT2		NCAPG2	E2F8		ITGA8	HAUS8	MCM7		EDNRB	NACC2	LGR5	CTGF	TACC3	GLI1	GLI1	LIPG	MTBP		WFDC1		PDE6H	FGF1				FZD4	PDE6H	KDR	NUSAP1				COL3A1	FEN1	EZH2	ISL1	DYSF	CXCL13	OTOP1		ISL1	HMOX1	CENPE
	GINS4	ORC6	DTL	EZH2	E2F8	ERCC6L		NCAPH2	EZH2		LGR5	HMGA2	MTBP		EMP2	ORC6	TGM1	SPAG5	TGFA	HAUS6	GPX1	SCUBE3	MYBL2		BMP5		RBP3	FGF10				GJA5	RBP3	BBS7	TACC3				COL28A1	FGF10	FBXL7	LIN28A	TGFB1	WNT4	NEUROG1		KARS	ISL1	KDR
	GLI1	PCNA	E2F1	FBXL7	EZH2	PIMREG		NUSAP1	FBXL7		PRDM16	KNTC1	NACC2		ESR1	PCNA	SIX4	MYBBP1A	TGFB1	HAUS8	GSTA1	ADAMTSL2	NCAPD2		GHSR		RBP4	GPR17				GJC1	RBP4	MMP14	TGFA				CTGF	FOXA1	FBXO5	LMX1A	THY1	COL3A1	OSR1		KRT1	KRT1	SPAG5
	ID3	POLA2	E2F7	FBXO5	FBXL7	FBXL7		POLE3	FBXO5		SIX4	PLK1	ORC6		EZH2	POLA2	KDR	SMC5	TRIP13	HMGA2	HAPLN2	COL3A1	NCAPH2		NKX2-8		RDH5	GPX1				GLI1	RDH5	CHRNA9	TGFB1				KDR	GLI1	FEN1	HOPX	UCP2	CTGF	PRDM1		CXCL13	CXCL13	CYP26B1
	PCLAF	POLE	E2F8	FGF10	FBXO5	FBXO5		RAD54B	FGF10		CHRDL1	CENPE	PCNA		FBXO5	POLE	MMP14	MAD2L1	UBE2C	KNTC1	ID3	COL28A1	NDC80		NODAL		RLBP1	GUCA1B				GPX1	RLBP1	WNT1	TRIP13				MMP14	HMGA2	FGF10	MAG	HGF	KDR	PRRX1		NLRP1	WNT4	SMC5
	LIG1	POLE2	ECT2	FOXM1	FGF10	FGF1		RBBP4	FOXA1		BCAR3	CEP152	POLA2		FGF1	POLE2	WNT16	MTBP		PLK1	KRT15	CTGF	NEUROG1		OSR1		RPGRIP1	HTRA1				HHIP	RPGRIP1	LRIG3	UBE2C				VCAN	TGM1	FOXM1	WNT4		MMP14	RBP4		ALOX5	COL3A1	INF2
	POLQ	RFC4	EZH2	HAUS6	FOXM1	HAUS6		RPA2	GADD45GIP1		BBS7	MAD2L1	POLE		FGF10	POLE3	WFDC1	NDC80		CENPE	KRT18	KDR	NUSAP1		PDCL3		SIX6	HYAL2				HMGA2	SIX6	WNT16					LAMA2	WNT4	GLI1	SIX4		HK2	ROR2		OSMR	CTGF	MAD2L1
	NFIC	RFC5	FBXL7	HAUS8	GLI1	HAUS8		RUVBL2	HAUS6		GJA8	MTBP	POLE2		FOSL2	PSME1	BMP5	NEUROG1		CEP152	KRT1	MMP14	TACC3		DYSF		SLC45A2	ISL1				HMOX1	SLC45A2	EFEMP1					RECK	CTGF	HAUS6	MCF2		PTGS2	RPGRIP1		CYP26B1	KDR	MND1
	MCM10	RPA2	FBXO5	HMGA2	HAUS6	HELLS		SMARCA1	HAUS8		CHRNA9	NACC2	POLE3		FOXM1	RBBP8	GHSR	NUSAP1		MAD2L1	LGALS3	VCAN	TGFA		SERPINF1		TYR	KARS				ISL1	TYR	BMP5					FBN1	SPAG5	HAUS8	NR2F1		THBS2	SIX1		WFDC1	MMP14	MTBP
	MCM2	RPA3	FGF10	IQGAP3	HAUS8	HMGA2		CDKN2A	HMGA2		WNT1	NDC80	PSME1		GLI1	RBL1	NKX2-8	PCNA		MTBP	TGM1	LAMA2	TGFB1		SIX1			KRT1				KRT1		CLRN1					COL18A1	MYBBP1A	HMGA2	COL3A1		GHSR	SIX2		PTGS2	HK2	MTFR2
	MCM4	TICRR	FOXM1	KNTC1	HMGA2	INCENP			INCENP		LRIG3	NEK11	RBBP8		GLUL	RPA2	NKX6-1	PHOX2B		NACC2	WNT4	RECK	TRIP13		SNAI2			CXCL13				LGR5		NCOA1					MMP11	SMC5	INCENP	DIXDC1		RECK	THY1		CYLD	PTGS2	MYBL2
	MCM5		GINS1	PLK1	IQGAP3	ITGB3BP			KIF11		PDE6A	NEUROG1	RBL1		HMGA2	RPA3	NODAL	TGFA		NDC80	HRH2	FBN1	UBE2C		TEK			NLRP1				CXCL13		FBN1					NID1	MAD2L1	KIF11	WNT1		COL18A1	TWIST1		TLR8	THBS2	NCAPD2
	MCM7		HAUS6	CENPE	KNTC1	KIF11			KNTC1		CYP26B1	PCNA	RPA2		HMOX1	CDKN2A	OSR1	TGFB1		NEK11	KRT23	COL18A1			TGFA			RNF125				WNT4		OTOP1					NID2	MTBP	KNSTRN	BHLHE41		NFATC4	ARID1A		GHSR	GHSR	NCAPH2
	ORC6		HAUS8	CEP152	PLK1	KNSTRN			PLK1		WNT16	PHOX2B	RPA3		HTRA1		PDCL3	UBE2C		NEUROG1	RILPL1	LPL			TGFB1			WNT4				SIX4		NEUROG1					TGFB1	NDC80	KNTC1	SYT4		NODAL			ADAMTS12	RECK	NDC80
	PCNA		HMGA2	MAD2L1	CENPE	KNTC1			CENPE		EFEMP1	PKIA	CDKN2A		IGFBP2		DYSF			PCNA	CLDN3	SDCBP			TINF2			TBR1				COL3A1		NKX2-6					TNFRSF11B	NEUROG1	WNT4	DNM3		NPPB			LPL	COL18A1	NEUROG1
	POLA2		INCENP	MCM10	CEP152	LIG1			CEP152		BMP5	PSME1			IQGAP3		SERPINF1			PHOX2B	WNT1	MMP11			TNMD			KDR				CTGF		NODAL					CSGALNACT1	NUSAP1	PLK1	EFEMP1		PDCL3			LY75	NFATC4	NUSAP1
	POLE		IQGAP3	MCM2	MAD2L1	CDCA3			SMC5		CLRN1	RBL1			ISL1		SIX1			PKIA	CYP26B1	NID1			TWIST1			OSMR				KDR		NOTO					DDR2	PCNA	CENPE	BMP5		PIK3R6			MMP25	NODAL	RAD54B
	POLE2		KIF11	MCM4	MCM10	KNL1			CYLD		FBN1	RNASEH2B			LAMB1		SNAI2			PSME1	CEP152	NID2						GUCY2F				BBS7		OSR1						PHOX2B	CTGF	ADAMTS12		PRDM1			NFATC4	NPPB	RPA2
	POLE3		KNSTRN	MCM5	MCM2	PLK1			MAD2L1		OTOP1	RPA2			LIN28A		TEK			RBL1	WNT16	PLTP						PDE6A				MMP14		POLE						TGFA	SPAG5	FBN1		PRRX1			PBK	OSR1	STAT2
	RBBP4		KNTC1	MCM7	MCM4	CENPE			SDCBP		MCM2	TGFB1			TGM1		TGFA			RNASEH2B	KEAP1	TGFB1						WFDC1				WNT1		PRDM1						TGFB1	MYBBP1A	LRRC17		PTK2B			PROS1	PDCL3	TACC3
	RBBP8		LIG1	MTBP	MCM5	DOCK7			MSH2		MYOM1	TICRR			CLCF1		TGFB1			RPA2	BMP5	TNFRSF11B						PTGS2				HK2		PRRX1						UBE2C	CEP152	MMP11		DYSF			S1PR3	PIK3R6	TGFA
	RFC4		WDR62	NACC2	MCM7	DIXDC1			MTBP		NEUROD4	TRIP13			VIPR1		TINF2			TGFB1	CLRN1	CSGALNACT1						CYLD				PTGS2		RBP4							SMC5	NCAPG2		SERPINF1			SERPINC1	PRDM1	TGFB1
	RFC5		PLK1	NDC80	MTBP	MISP			NACC2		NEUROG1	UBE2C			CTGF		TNMD			TICRR	COL18A1	DDR2						THBD				THBS2		ROR2							MAD2L1	NFATC4		SIX1			SERPINF1	PRRX1	TRIP13
	RPA2		CENPE	NEK11	NACC2	SPAG5			NDC80		NKX2-6				KDR		TWIST1			TRIP13	NKX6-1							GHSR				BMP5		SIX1							MTBP	NKX6-1		TBX20			TBXA2R	PTK2B	UBE2C
	RPA3		HTT	NEUROG1	NDC80	SMC5			NEK11		OSR1				OSMR					UBE2C	NODAL							ADAMTS12				GHSR		SIX2							NACC2	NODAL		TBXA2R			TEK	DYSF
	RRM1		SPAG5	ORC6	NEK11	MAD2L1			NEUROG1		PHOX2B				POU1F1						NTRK1							LPL				ADAMTS12		TBX20							NDC80	OMG		TEK			TGFB1	SEMA3C
	TICRR		CEP152	PCNA	NEUROG1	MIS18A			NUSAP1		PRDM1				WNT1						MARVELD2							NTF3				RECK		TGFB1							NEK11	OSR1		TGFB1			TRIL	SERPINF1
			SMC5	PHOX2B	ORC6	MIS18BP1			PCNA		PRRX1				PTGS2						OSR1							P2RY12				COL18A1		TWIST1							NEUROG1	P2RY12		THY1			TRPV1	SIX1
			MAD2L1	PKIA	PCNA	NCAPD2			PHOX2B		RBP4				MYB						PCK1							PARP9				NFATC4		ARID1A							NUSAP1	PHOX2B		TNFAIP2			TSPAN2	TBX20
			MCM10	POLA2	PHOX2B	NCAPG2			PKIA		ROR2				BMP5						PCNA							PBK				NODAL									PCNA	PMP22		TNMD			HGF	TBXA2R
			MCM2	POLE	PKIA	NDC80			PSME1		RPGRIP1				GHSR						PRDM1							PROS1				NOTO									PHOX2B	PRTG		TWIST1			PRKCD	TEK
			MCM4	POLE2	POLA2	NUSAP1			RBL1		RRM1				COL18A1						S1PR3							PTK2B				NPPB									PKIA	PTK2B		TYMP			TIRAP	TGFB1
			MCM5	POLE3	POLE	ORC6			RNASEH2B		SERPINF1				SDCBP						SIX1							DYSF				OSR1									PSME1	S1PR3		PTPRB				THY1
			MCM7	PSME1	POLE2	RBBP8			RPA2		SIX1				NACC2						SIX2							SEMA3C				PDCL3									RBBP4	SEMA3C		HGF				TNFAIP2
			MSH2	RBBP8	POLE3	RBL1			RPA3		SIX2				NKX2-6						TGFB1							SERPINC1				PIK3R6									RBBP8	SIX2		RBM15				TNMD
			MTBP	RBL1	PSME1	SKA1			STK33		SIX6				NODAL						TNMD							SERPINF1				PRDM1									RBL1	SKOR1		NPR1				TWIST1
			MYBL2	RNASEH2B	RBBP8	SKA3			TACC3		TGFB1				NTF3						UPK3A							SNAI2				PRRX1									RNASEH2B	SNAI2						TYMP
			NACC2	RPA2	RBL1	SPC24			TGFA		TGIF2				OSR1						WWTR1							TBXA2R				PTK2B									RPA2	SOX10						PTPRB
			NCAPD2	RPA3	RNASEH2B	SPC25			TGFB1		THY1				PDCL3													TEK				DYSF									RYBP	TGFB1						HGF
			NCAPH2	TACC3	RPA2	TACC3			TICRR		TWIST1				PRRX1													TGFB1				SERPINF1									TACC3	THY1						RBM15
			NDC80	TGFB1	RPA3	TGFA			TRIP13		ARID1A				PTK2B													TUBB2B				SIX1									TGFA	TRPV1						ARID1A
			NEK11	TICRR	TACC3	TGFB1			UBE2C						RNASEH2B													HGF				SIX2									TGFB1	TWIST1						NPR1
			NEUROG1	TRIP13	TGFB1	UBE2C									DYSF													PRKCD				SOX10									TICRR	WWTR1
			NUSAP1	UBE2C	TICRR	VRK1									RPS9													TIRAP				TBX20									TRIP13	RBM15
			ORC6	CDKN2A	TRIP13	WWTR1									S1PR3																	TBXA2R									UBE2C	LDLRAD4
			PCNA		UBE2C										SIX1																	TEK
			PHOX2B		CDKN2A										SIX2																	TGFB1
			PKIA												SOX10																	THY1
			POLA2												TBX20																	TNFAIP2
			POLE												TEK																	TNMD
			POLE2												TGFA																	TWIST1
			POLE3												TGFB1																	TYMP
			PSME1												TMEM119																	PTPRB
			RBBP8												TWIST1																	HGF
			RBL1												WWTR1																	RBM15
			RNASEH2B												DDR2																	ARID1A
			RPA2												KLB																	NPR1
			RPA3												TIRAP
			SPC25
			STK33
			TACC3
			TGFA
			TGFB1
			TICRR
			TRIP13
			UBE2C
			VRK1
			CDKN2A
[truncated: 86 more columns]

## Sheet: MB_55v61_GO_BP
ID	GO:0044772	GO:1903047	GO:0044770	GO:0051301	GO:0048285	GO:0006260	GO:0044843	GO:1901990	GO:0000082	GO:0007346	GO:0006261	GO:0000280	GO:0007088	GO:1901987	GO:0140014	GO:0006270	GO:0010564	GO:0051783	GO:0007059	GO:1901988	GO:1901991	GO:0051306	GO:0000070	GO:0051983	GO:0008284	GO:0090068	GO:0098813	GO:0033047	GO:0071103	GO:0000075	GO:0007091	GO:0010965	GO:0010948	GO:0008608	GO:0007093	GO:0044839	GO:0044784	GO:0045930	GO:1905818	GO:0045841	GO:2000816	GO:0051304	GO:0030071	GO:1902100	GO:1905819	GO:0090596	GO:0000819	GO:0000086	GO:0044786
Description	mitotic cell cycle phase transition	mitotic cell cycle process	cell cycle phase transition	cell division	organelle fission	DNA replication	cell cycle G1/S phase transition	regulation of mitotic cell cycle phase transition	G1/S transition of mitotic cell cycle	regulation of mitotic cell cycle	DNA-dependent DNA replication	nuclear division	regulation of mitotic nuclear division	regulation of cell cycle phase transition	mitotic nuclear division	DNA replication initiation	regulation of cell cycle process	regulation of nuclear division	chromosome segregation	negative regulation of cell cycle phase transition	negative regulation of mitotic cell cycle phase transition	mitotic sister chromatid separation	mitotic sister chromatid segregation	regulation of chromosome segregation	positive regulation of cell proliferation	positive regulation of cell cycle process	nuclear chromosome segregation	regulation of mitotic sister chromatid segregation	DNA conformation change	cell cycle checkpoint	metaphase/anaphase transition of mitotic cell cycle	regulation of mitotic sister chromatid separation	negative regulation of cell cycle process	attachment of spindle microtubules to kinetochore	mitotic cell cycle checkpoint	cell cycle G2/M phase transition	metaphase/anaphase transition of cell cycle	negative regulation of mitotic cell cycle	regulation of chromosome separation	negative regulation of mitotic metaphase/anaphase transition	negative regulation of mitotic sister chromatid separation	chromosome separation	regulation of mitotic metaphase/anaphase transition	negative regulation of metaphase/anaphase transition of cell cycle	negative regulation of chromosome separation	sensory organ morphogenesis	sister chromatid segregation	G2/M transition of mitotic cell cycle	cell cycle DNA replication
GeneRatio	55/381	69/381	56/381	49/381	40/381	32/381	30/381	35/381	29/381	46/381	23/381	36/381	23/381	36/381	28/381	11/381	48/381	23/381	27/381	22/381	20/381	12/381	17/381	15/381	48/381	24/381	22/381	12/381	20/381	22/381	11/381	11/381	25/381	9/381	18/381	21/381	11/381	23/381	11/381	9/381	9/381	13/381	10/381	9/381	9/381	23/381	17/381	19/381	11/381
BgRatio	287/8288	443/8288	313/8288	326/8288	238/8288	159/8288	145/8288	196/8288	137/8288	323/8288	87/8288	212/8288	91/8288	219/8288	139/8288	20/8288	389/8288	106/8288	158/8288	108/8288	96/8288	34/8288	73/8288	58/8288	453/8288	145/8288	128/8288	39/8288	110/8288	132/8288	33/8288	33/8288	167/8288	21/8288	94/8288	125/8288	35/8288	151/8288	36/8288	23/8288	23/8288	52/8288	30/8288	24/8288	24/8288	156/8288	92/8288	113/8288	39/8288
pvalue	2.30641e-20	3.93903e-20	3.00626e-19	8.29228e-14	4.87709e-13	7.84033e-13	1.98503e-12	2.51587e-12	2.56744e-12	3.70413e-12	3.83837e-12	5.63849e-12	1.06282e-11	1.50453e-11	2.19775e-11	1.9437e-10	2.18788e-10	2.99444e-10	2.45007e-09	2.62294e-09	9.3701e-09	1.64184e-08	2.12684e-08	3.19912e-08	3.49965e-08	3.68729e-08	6.89795e-08	9.49804e-08	1.05097e-07	1.218e-07	1.30225e-07	1.30225e-07	1.46931e-07	1.50081e-07	2.03833e-07	2.06074e-07	2.58305e-07	3.40546e-07	3.56795e-07	3.84328e-07	3.84328e-07	4.13613e-07	4.92899e-07	5.90174e-07	5.90174e-07	6.18249e-07	7.58795e-07	7.79075e-07	8.7855e-07
p.adjust	7.27146e-17	7.27146e-17	3.6997e-16	7.65377e-11	3.60125e-10	4.82442e-10	1.04696e-09	1.05322e-09	1.05322e-09	1.2883e-09	1.2883e-09	1.73478e-09	3.01841e-09	3.96766e-09	5.40941e-09	4.48508e-08	4.75156e-08	6.14193e-08	4.76087e-07	4.84195e-07	1.64735e-06	2.75531e-06	3.41404e-06	4.92131e-06	5.16828e-06	5.23595e-06	9.4323e-06	1.25238e-05	1.338e-05	1.49896e-05	1.50247e-05	1.50247e-05	1.6297e-05	1.6297e-05	2.11341e-05	2.11341e-05	2.57747e-05	3.30867e-05	3.37765e-05	3.46082e-05	3.46082e-05	3.63585e-05	4.23205e-05	4.84205e-05	4.84205e-05	4.96212e-05	5.96057e-05	5.99238e-05	6.54912e-05
qvalue	6.31075e-17	6.31075e-17	3.2109e-16	6.64255e-11	3.12545e-10	4.18701e-10	9.08635e-10	9.1407e-10	9.1407e-10	1.11809e-09	1.11809e-09	1.50558e-09	2.61961e-09	3.44345e-09	4.69471e-09	3.89251e-08	4.12378e-08	5.33045e-08	4.13186e-07	4.20223e-07	1.4297e-06	2.39127e-06	2.96298e-06	4.2711e-06	4.48544e-06	4.54417e-06	8.1861e-06	1.08692e-05	1.16122e-05	1.30091e-05	1.30396e-05	1.30396e-05	1.41438e-05	1.41438e-05	1.83418e-05	1.83418e-05	2.23693e-05	2.87153e-05	2.9314e-05	3.00358e-05	3.00358e-05	3.15548e-05	3.67291e-05	4.20231e-05	4.20231e-05	4.30652e-05	5.17306e-05	5.20066e-05	5.68385e-05
Genes	ADAMTS1	ADAMTS1	ADAMTS1	ANLN	ANLN	ATAD5	ADAMTS1	ADAMTS1	ADAMTS1	ADAMTS1	ATAD5	ANLN	ANLN	ADAMTS1	ANLN	CDC45	ADAMTS1	ANLN	AURKB	AURKB	AURKB	AURKB	AURKB	AURKB	ADAMTS1	ADAMTS1	AURKB	AURKB	BRIP1	AURKB	AURKB	AURKB	AURKB	AURKB	AURKB	ATAD5	AURKB	AURKB	AURKB	AURKB	AURKB	AURKB	AURKB	AURKB	AURKB	COL2A1	AURKB	AURKB	ATAD5
	ANLN	ANLN	ANLN	AURKB	AURKB	BARD1	BTG2	ANLN	BTG2	ANLN	CDC45	AURKB	AURKB	ANLN	AURKB	CDC7	ANLN	AURKB	BRIP1	BTG2	BTG2	BUB1	BUB1	BUB1	ALDH1A2	ATAD5	BRIP1	BUB1	CCNB1	BRIP1	BUB1	BUB1	BTG2	CCNB1	BTG2	AURKB	BUB1	BTG2	BUB1	BUB1	BUB1	BUB1	BUB1	BUB1	BUB1	DIO3	BUB1	BORA	CDC45
	ATAD5	ATAD5	ATAD5	BORA	BORA	BRIP1	CCNA2	ATAD5	CCNB1	ATAD5	CDC7	BORA	BORA	ATAD5	BORA	CDK2	ATAD5	BORA	BUB1	BUB1	BUB1	CCNB1	CCNB1	CCNB1	ATAD5	AURKB	BUB1	CCNB1	CDC45	BTG2	CCNB1	CCNB1	BUB1	ECT2	BUB1	BORA	CCNB1	BUB1	CCNB1	CCNB1	CCNB1	CCNB1	CCNB1	CCNB1	CCNB1	DLL1	CCNB1	CCNA2	CDC7
	AURKB	AURKB	AURKB	BRIP1	BRIP1	CCNA2	CCNB1	AURKB	CCND1	AURKB	CDK2	BRIP1	BUB1	AURKB	BUB1	MCM10	AURKB	BUB1	CCNB1	CCNB1	CCNB1	FBXO5	FBXO5	ECT2	BNC1	BTG2	CCNB1	FBXO5	CENPL	BUB1	FBXO5	FBXO5	CCNB1	KNSTRN	CCNB1	CCNA2	FBXO5	CCNB1	FBXO5	FBXO5	FBXO5	FBXO5	FBXO5	FBXO5	FBXO5	FBN2	FBXO5	CCNB1	DBF4B
	BORA	BORA	BORA	BUB1	BUB1	CDC45	CCND1	BTG2	CDC45	BORA	CHTF18	BUB1	CCNA2	BTG2	CCNA2	MCM2	BORA	CCNA2	CENPN	CCND1	CCND1	PLK1	KNSTRN	FBXO5	CCNA2	CCNB1	ECT2	PLK1	CENPN	CCNB1	PLK1	PLK1	CCND1	KNL1	CCND1	CCNB1	PLK1	CCND1	PLK1	PLK1	PLK1	PLK1	PLK1	PLK1	PLK1	FGF10	KNSTRN	CCNB2	E2F7
	BTG2	BTG2	BTG2	CCNA2	CCNA2	CDC7	CDC45	BUB1	CDC7	BTG2	DBF4B	CCNA2	CCNB1	BUB1	CCNB1	MCM4	BTG2	CCNB1	ECT2	CDK2	CDK2	MAD1L1	PLK1	KNSTRN	CCNB1	CCND1	FANCD2	MAD1L1	GINS4	CCND1	MAD1L1	MAD1L1	CDC7	MAD1L1	CDK2	CCNB2	MAD1L1	CDK2	MAD1L1	MAD1L1	MAD1L1	MAD1L1	MAD1L1	MAD1L1	MAD1L1	FOXN4	PLK1	CCND1	E2F8
	BUB1	BUB1	BUB1	CCNB1	CCNB1	CDK2	CDC7	CCNB1	CDK2	BUB1	E2F7	CCNB1	CCNB2	CCNB1	CCNB2	MCM5	BUB1	CCNB2	FANCD2	CHEK1	E2F1	CENPE	MAD1L1	PLK1	CCNB2	CDC45	FBXO5	CENPE	HELLS	CDC45	CENPE	CENPE	CDK2	CENPE	E2F1	CCND1	CENPE	CHEK1	CENPE	MAD2L1	MAD2L1	CENPE	CENPE	MAD2L1	MAD2L1	FZD2	MAD1L1	CDC7	FBXO5
	CCNA2	CCNA2	CCNA2	CCNB2	CCNB2	CHEK1	CDK2	CCND1	DHFR	CCNA2	E2F8	CCNB2	CCND1	CCND1	CCND1	MCM7	CCNA2	CCND1	FBXO5	DTL	E2F7	MAD2L1	CENPE	MAD1L1	CCND1	CDC7	KNSTRN	SMC5	KNL1	CDK2	MAD2L1	MAD2L1	CHEK1	SPAG5	E2F7	CDC7	MAD2L1	E2F1	MAD2L1	NDC80	NDC80	MAD2L1	MAD2L1	NDC80	NDC80	GNGT1	CENPE	CDK2	POLA2
	CCNB1	CCNB1	CCNB1	CCND1	CCND1	CHTF18	DHFR	CDC45	E2F1	CCNB1	FBXO5	CCND1	CHEK1	CDC45	CHEK1	ORC6	CCNB1	CHEK1	KNSTRN	E2F1	E2F8	NCAPH2	SPAG5	CENPE	CDC7	CDK2	KNL1	MAD2L1	MCM2	CHEK1	NDC80	NDC80	DTL	NDC80	E2F8	CDK2	NDC80	E2F7	NDC80	TRIP13	TRIP13	NCAPD2	NDC80	TRIP13	TRIP13	ITGA8	SPAG5	DBF4B	RFC5
	CCNB2	CCNB2	CCNB2	CDC7	CHEK1	DBF4B	E2F1	CDC7	E2F7	CCNB2	GINS4	CHEK1	FBXO5	CDC7	FBXO5	POLA2	CCNB2	FBXO5	KNL1	E2F7	FBXO5	NDC80	SMC5	SPAG5	CDCA7L	DBF4B	PLK1	NDC80	MCM4	DTL	TACC3	TACC3	E2F1		KNTC1	CHEK1	TACC3	E2F8	TACC3			NCAPH2	TRIP13			TULP1	SMC5	DTL	RPA2
	CCND1	CCND1	CCND1	CDCA2	DCN	DTL	E2F7	CDK2	E2F8	CCND1	MCM10	FANCA	KIF11	CDK2	KIF11	TICRR	CCND1	KIF11	PLK1	E2F8	PLK1	TACC3	MAD2L1	SMC5	CDK2	DTL	MAD1L1	TACC3	MCM7	E2F1	TRIP13	TRIP13	E2F7		PLK1	DBF4B	TRIP13	FBXO5	TRIP13			NDC80				LRIG3	MAD2L1	FBXO5	RPA3
	CDC45	CDC45	CDC45	CDK2	FANCA	E2F7	E2F8	DBF4B	FBXO5	CDC45	MCM2	FANCD2	KNTC1	CHEK1	KNSTRN		CDC45	KNTC1	MAD1L1	FBXO5	MAD1L1	TRIP13	NCAPD2	MAD2L1	CGA	E2F1	CENPE	TRIP13	MIS18A	E2F7			E2F8		MAD1L1	DTL		KNTC1				TACC3				CYP26B1	NCAPD2	FOXM1
	CDC7	CDC7	CDC7	CKAP2	FANCD2	E2F8	FBXO5	DTL	FGF10	CDC7	MCM4	FBXO5	PLK1	DBF4B	KNTC1		CDC7	PLK1	CENPE	PLK1	MAD2L1		NCAPH2	NDC80	CXCL12	E2F7	SPAG5		MIS18BP1	E2F8			FBXO5		MAD2L1	FBXO5		PLK1				TRIP13				NEUROG1	NCAPH2	HAUS6
	CDK2	CDK2	CDK2	DLL1	FBXO5	FBXO5	FGF10	E2F1	IQGAP3	CDK2	MCM5	KIF11	MAD1L1	DTL	PLK1		CDK2	MAD1L1	SPAG5	MAD1L1	FHL1		NDC80	TACC3	DBF4B	E2F8	SMC5		NCAPD2	KNTC1			FGF10		MSH2	FOXM1		MAD1L1								OSR1	NDC80	HAUS8
	DBF4B	CHEK1	CHEK1	E2F7	KIF11	FGF10	IQGAP3	E2F7	MCM10	CHEK1	MCM7	KNSTRN	CENPE	E2F1	MAD1L1		CHEK1	CENPE	SMC5	MAD2L1	NACC2		NUSAP1	TRIP13	DLL1	ECT2	MAD2L1		NCAPG2	PLK1			PLK1		NDC80	HAUS6		MAD2L1								PRDM1	NUSAP1	PLK1
	DHFR	CKAP2	DBF4B	E2F8	KNSTRN	GINS4	MCM10	E2F8	MCM2	DBF4B	ORC6	KNTC1	SMC5	E2F7	CENPE		DBF4B	SMC5	MAD2L1	FHL1	NDC80		TACC3		DMRTA2	FBXO5	MAEL		NCAPH2	MAD1L1			MAD1L1		RPA2	HAUS8		FHL1								PRRX1	TACC3	CEP152
	DTL	DBF4B	DHFR	ECT2	KNTC1	PCLAF	MCM2	FBXO5	MCM4	DTL	POLA2	PLK1	MAD2L1	E2F8	SPAG5		DTL	MAD2L1	MAEL	NACC2	RPA2		TRIP13		E2F1	FGF10	NCAPD2		NUSAP1	MAD2L1			MAD2L1		TICRR	PLK1		MSH2								RBP4	TRIP13	FHL1
	E2F1	DHFR	DTL	ERCC6L	PLK1	MCM10	MCM4	FGF10	MCM5	E2F1	POLE	MAD1L1	NDC80	FBXO5	SMC5		E2F1	NDC80	MIS18A	NDC80	TICRR				EDNRB	SPAG5	NCAPH2		POLE3	MSH2			FHL1		TRIP13	CEP152		NACC2								ROR2		NES
	E2F7	DTL	E2F1	PIMREG	MAD1L1	MCM2	MCM5	HAUS6	MCM7	E2F7	POLE2	CENPE	NEUROG1	FGF10	MAD2L1		E2F7	NEUROG1	NCAPD2	RPA2	TRIP13				EMP2	SMC5	NDC80		POT1	NDC80			NACC2			FHL1		NDC80								RPGRIP1		TICRR
	E2F8	E2F1	E2F7	FBXO5	CENPE	MCM4	MCM7	HAUS8	FHL1	E2F8	RFC5	SPAG5	NUSAP1	HAUS6	MYBL2		E2F8	NUSAP1	NCAPH2	TICRR	ZFP36L1				FBXO5	MAD2L1	NUSAP1		RPA2	RPA2			NDC80			NES		RPA2								SIX1
	FBXO5	E2F7	E2F8	HAUS6	KDR	MCM5	FHL1	KNTC1	NACC2	FBXO5	RPA2	CYP26B1	TACC3	HAUS8	NCAPD2		ECT2	TACC3	NDC80	TRIP13					FGF10	NDC80	TACC3			TICRR			RBBP8			TICRR		TICRR								SIX2
	FGF10	E2F8	FBXO5	HAUS8	SPAG5	MCM7	NACC2	PLK1	ORC6	FGF10	RPA3	SMC5	TRIP13	KNTC1	NCAPH2		FBXO5	TRIP13	NUSAP1	ZFP36L1					FOXM1	NEUROG1	TRIP13			TRIP13			RPA2					TRIP13								SOX8
	FOXM1	ECT2	FGF10	HELLS	CYP26B1	ORC6	ORC6	MAD1L1	POLA2	HAUS6	TICRR	MAD2L1	UBE2C	PLK1	NDC80		FGF10	UBE2C	SKA1						RICTOR	NUSAP1							TICRR					ZFP36L1								ARID1A
	HAUS6	FBXO5	FOXM1	KIF11	SMC5	POLA2	POLA2	CENPE	POLE	HAUS8		MAEL		MAD1L1	NEUROG1		FOXM1		SKA3						IQGAP3	UBE2C							TRIP13
	HAUS8	FGF10	HAUS6	KNSTRN	INF2	POLE	POLE	CEP152	POLE2	KIF11		MND1		CENPE	NUSAP1		HAUS6		SPC25						LIN28A								ZFP36L1
	IQGAP3	FOXM1	HAUS8	KNTC1	MAD2L1	POLE2	POLE2	MAD2L1	POLE3	KNTC1		MYBL1		CEP152	TACC3		HAUS8		TACC3						CSF1
	KNTC1	HAUS6	IQGAP3	CDCA3	MAEL	POLE3	POLE3	FHL1	RBBP8	PLK1		MYBL2		MAD2L1	TRIP13		KIF11		TRIP13						CLEC11A
	PLK1	HAUS8	KNTC1	KNL1	MND1	RBBP8	RBBP8	NACC2	RPA2	MAD1L1		NCAPD2		FHL1	UBE2C		KNSTRN								SFRP2
	MAD1L1	IQGAP3	PLK1	SFRP2	MTFR2	RFC5	RPA2	NDC80	RPA3	CENPE		NCAPH2		NACC2			KNTC1								IGFBP2
	CENPE	KIF11	MAD1L1	PLK1	MYBL1	RPA2	RPA3	NEUROG1		CEP152		NDC80		NDC80			PLK1								KDR
	CEP152	KNSTRN	CENPE	MAD1L1	MYBL2	RPA3		RPA2		SMC5		NEUROG1		NEUROG1			MAD1L1								OSMR
	MAD2L1	KNTC1	CEP152	CENPE	NCAPD2	TICRR		TICRR		CYLD		NUSAP1		RPA2			CENPE								POU1F1
	MCM10	WDR62	MAD2L1	SPAG5	NCAPH2			TRIP13		MAD2L1		RPA2		TICRR			SPAG5								TGFBR3
	MCM2	PLK1	MCM10	SMC5	NDC80			UBE2C		FHL1		TACC3		TRIP13			CEP152								PTGS2
	MCM4	MAD1L1	MCM2	MAD2L1	NEUROG1			ZFP36L1		MSH2		TRIP13		UBE2C			SMC5								COPS9
	MCM5	CENPE	MCM4	MIS18A	NUSAP1					NACC2		UBE2C		ZFP36L1			MAD2L1								MYB
	MCM7	SPAG5	MCM5	MIS18BP1	RPA2					NDC80							FHL1								MYOCD
	FHL1	CEP152	MCM7	NCAPD2	TACC3					NEUROG1							NACC2								NACC2
	NACC2	SMC5	FHL1	NCAPG2	TRIP13					NUSAP1							NDC80								NES
	NDC80	MAD2L1	NACC2	NDC80	UBE2C					RPA2							NEUROG1								OSR1
	NES	MCM10	NDC80	NUSAP1						RPA3							NUSAP1								PDCL3
	NEUROG1	MCM2	NES	ORC6						TACC3							RBBP8								PRRX1
	ORC6	MCM4	NEUROG1	RBBP8						TICRR							RPA2								RPS9
	POLA2	MCM5	ORC6	SKA1						TRIP13							TACC3								KLB
	POLE	MCM7	POLA2	SKA3						UBE2C							TICRR								SIX1
	POLE2	FHL1	POLE	SPC24						ZFP36L1							TRIP13								SIX2
	POLE3	MSH2	POLE2	SPC25													UBE2C								SOX8
	RBBP8	MYBL2	POLE3	TACC3													ZFP36L1								TEK
	RPA2	NACC2	RBBP8	UBE2C
	RPA3	NCAPD2	RPA2
	TACC3	NCAPH2	RPA3
	TICRR	NDC80	TACC3
	TRIP13	NES	TICRR
	UBE2C	NEUROG1	TRIP13
	ZFP36L1	NUSAP1	UBE2C
		ORC6	ZFP36L1
		POLA2
		POLE
		POLE2
		POLE3
		RBBP8
		RPA2
		RPA3
		SPC25
		TACC3
		TICRR
		TRIP13
		UBE2C
		ZFP36L1
[truncated: 86 more columns]
